# Supplementary material
Source: ML conference proceedings conference paper supplement (https://www.ecva.net/papers/eccv_2020/papers_ECCV/html/123690086_ECCV_2020_paper.php)
Supplement: Supplementary file 1 [file 123690086-supp.zip]

# Polarimetric Multi-View Inverse Rendering

Supplementary material

ECCV 2020

Jinyu Zhao, Yusuke Monno, Masatoshi Okutomi

Tokyo Institute of Technology

Comparison using synthetic data

# Armadillo

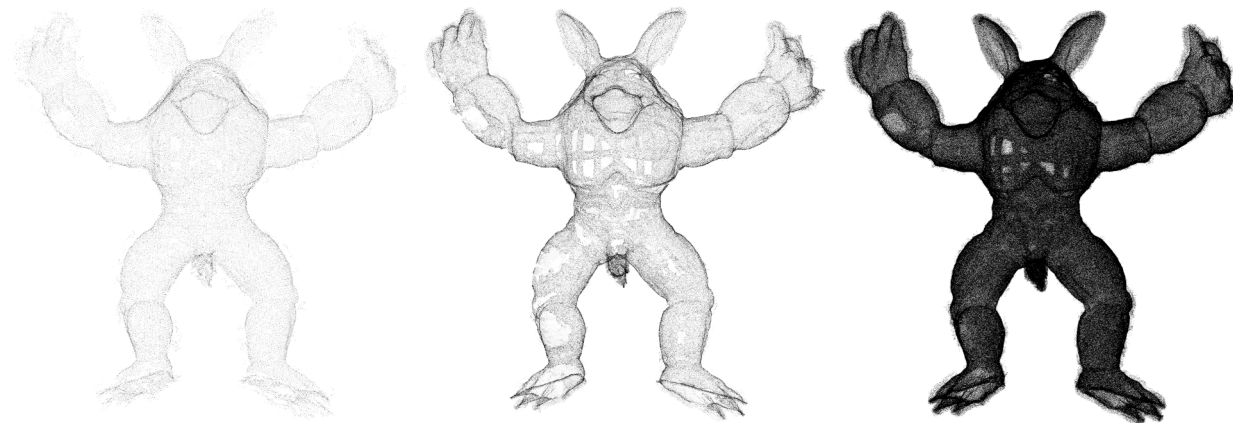

PMVS

COLMAP

OpenMVS

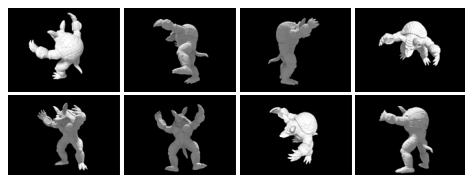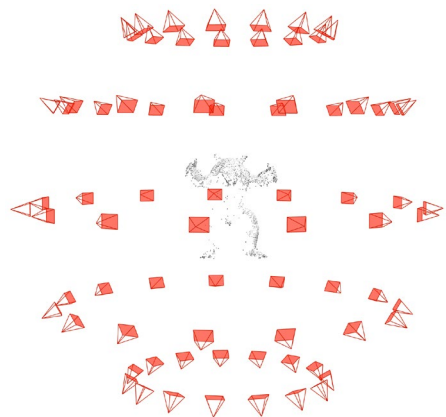

Input images and camera poses

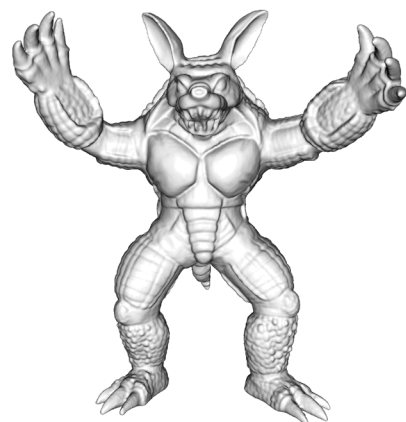

Ground truth

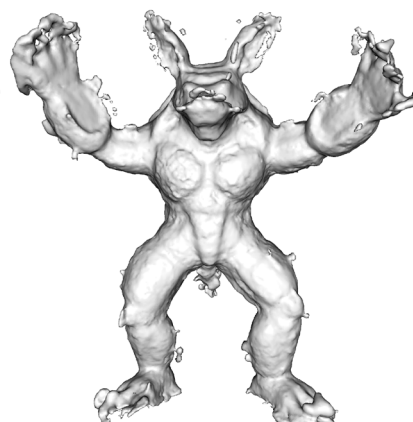

PMVS+Poisson

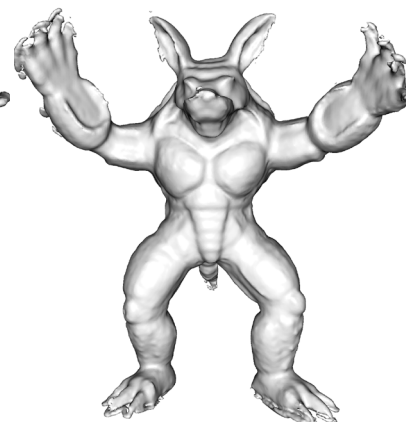

COLMAP+Poisson

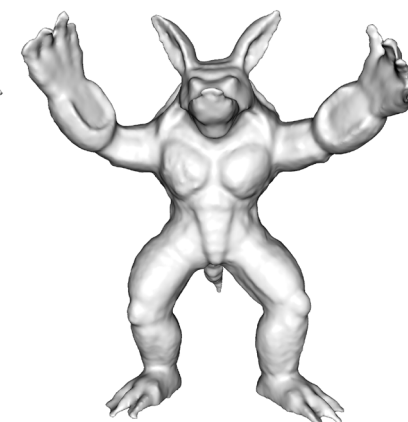

OpenMVS

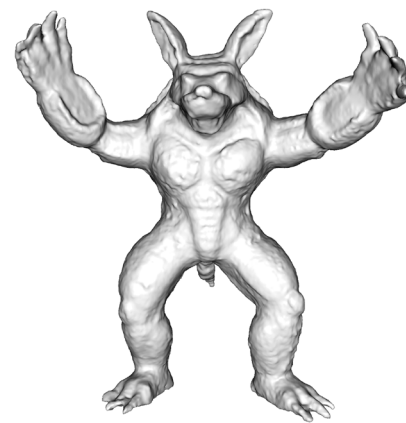

CPMVS

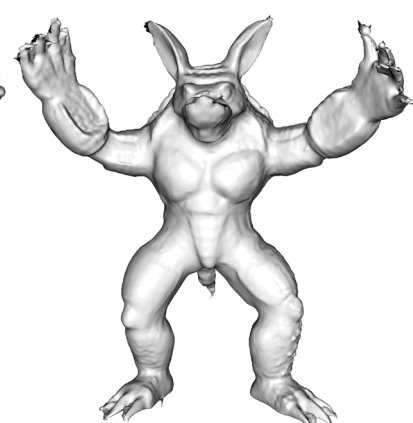

MVIR

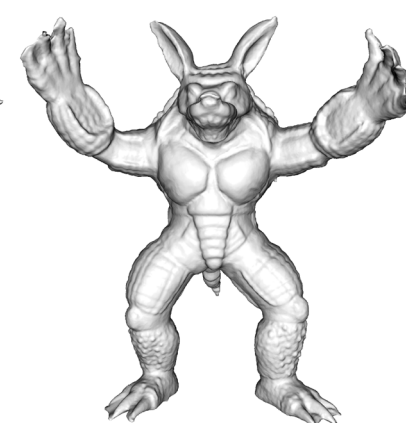

Polarimetric MVIR (Ours)

Estimated illumination

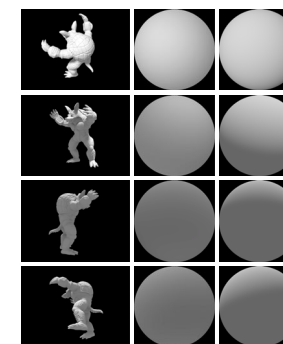

Image

Ours

GT

# Bunny

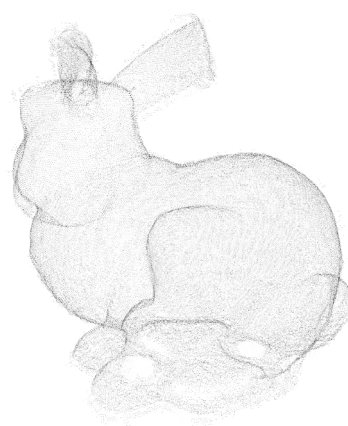

PMVS

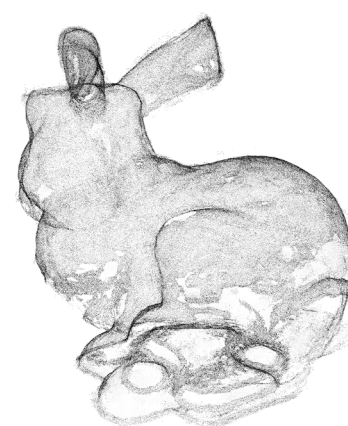

COLMAP

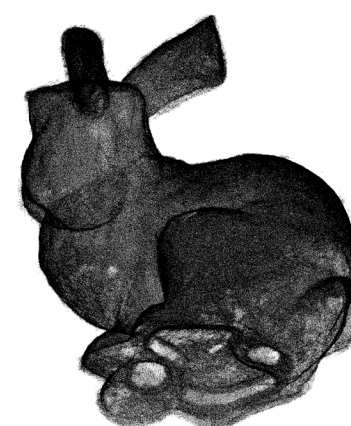

OpenMVS

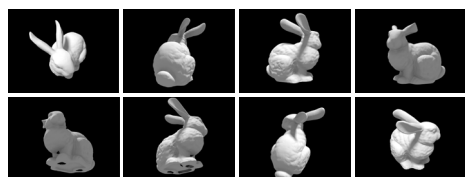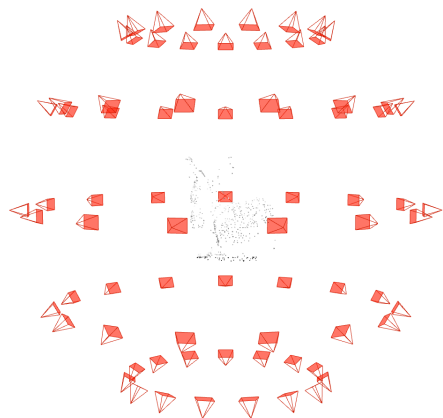

Input images and camera poses

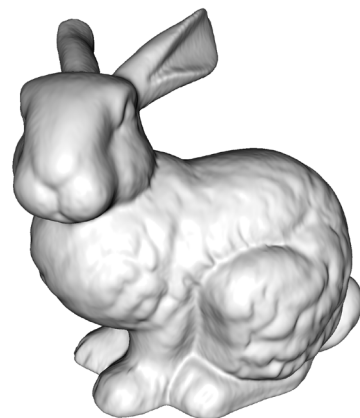

Ground truth

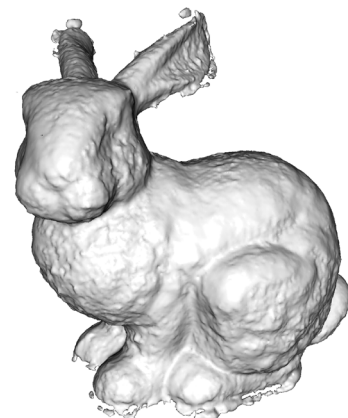

PMVS+Poisson

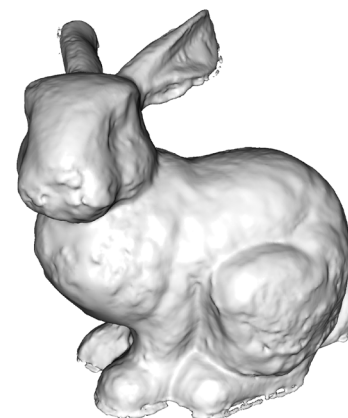

COLMAP+Poisson

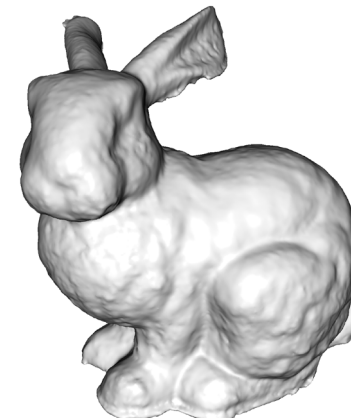

OpenMVS

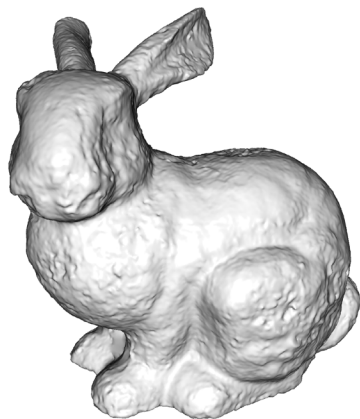

CMPMVS

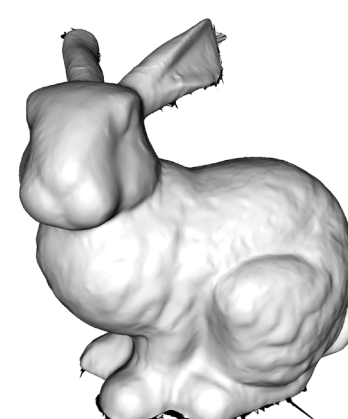

MVIR

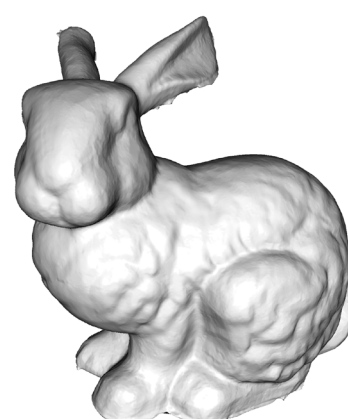

Polarimetric MVIR (Ours)

Estimated illumination

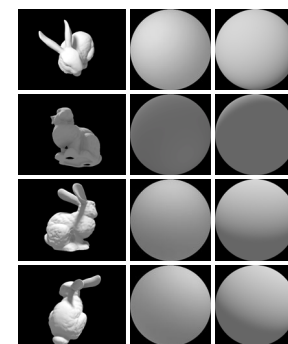

Image Ours GT

# Dragon

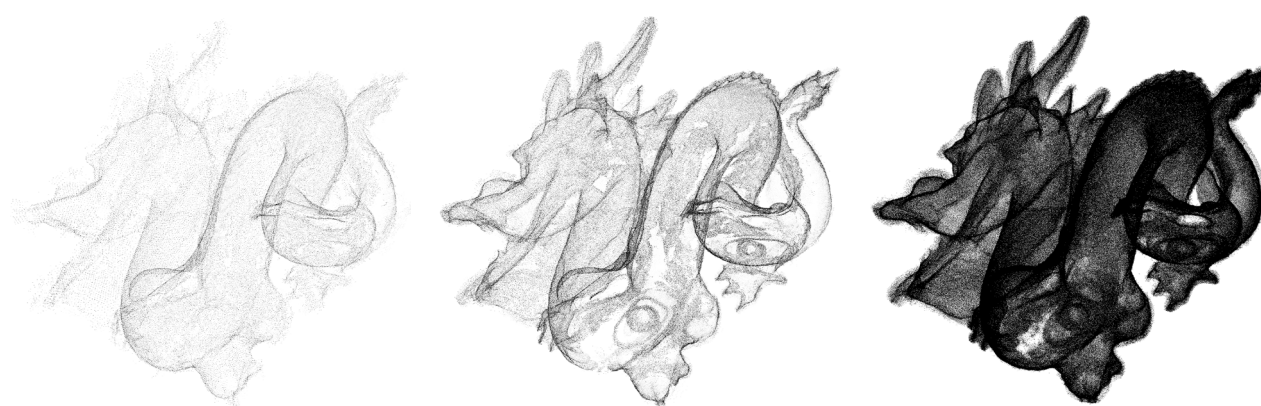

PMVS

COLMAP

OpenMVS

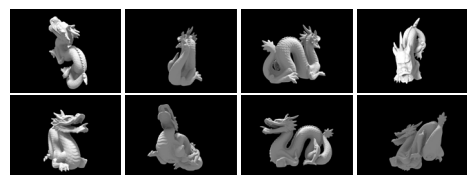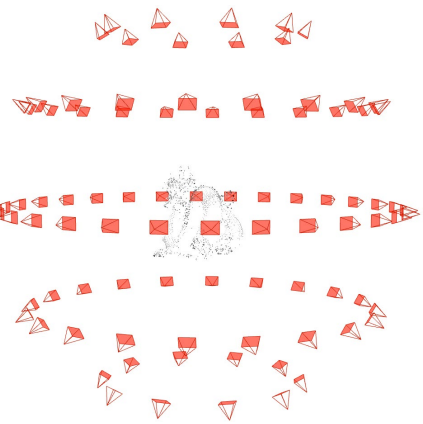

Input images and camera poses

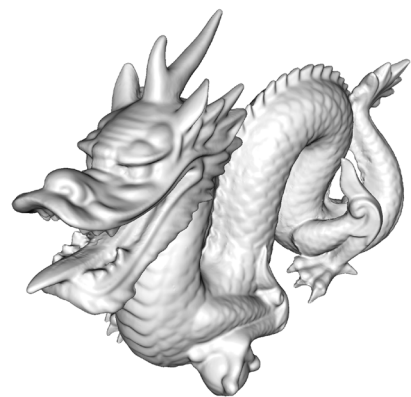

Ground truth

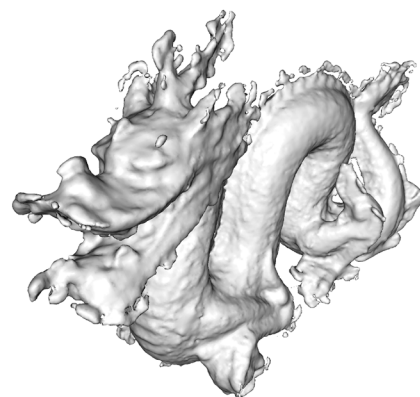

PMVS+Poisson

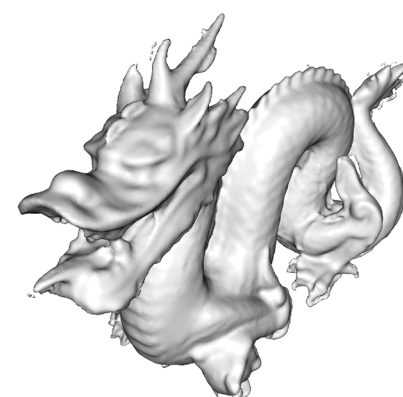

COLMAP+Poisson

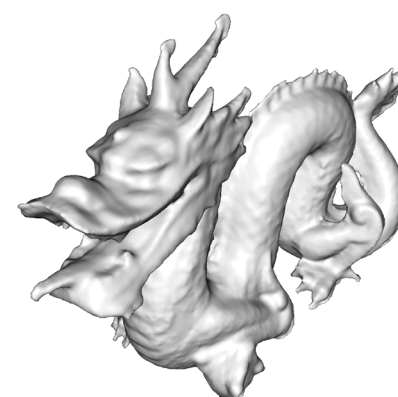

OpenMVS

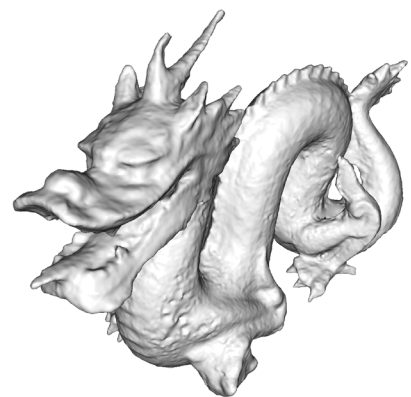

CMPMVS

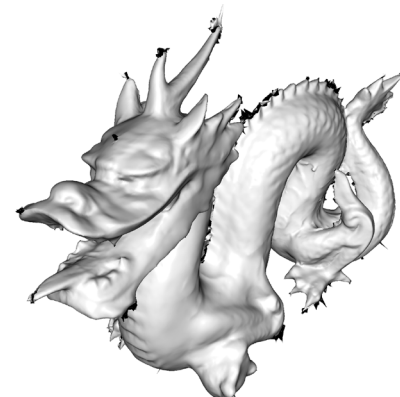

MVIR

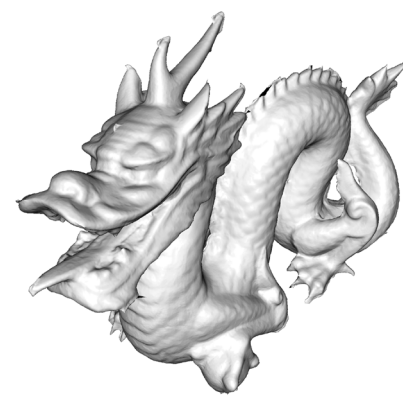

Polarimetric MVIR (Ours)

Estimated illumination

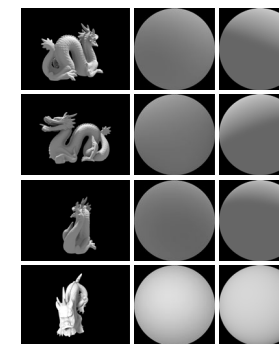

Image Ours GT

# Buddha

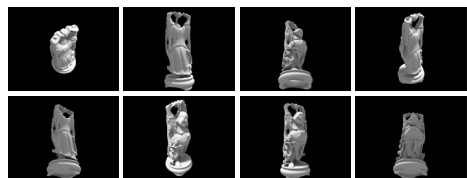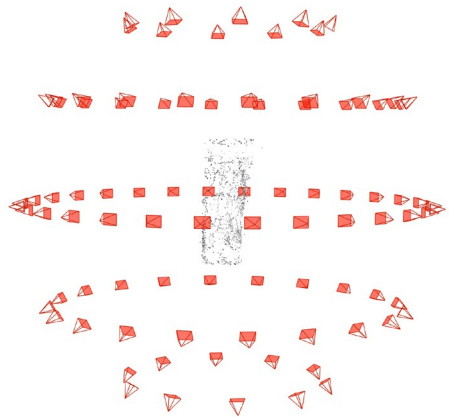

Input images and camera poses

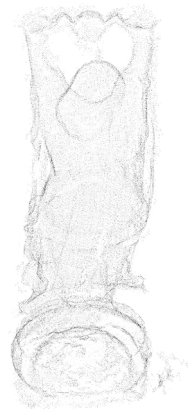

PMVS

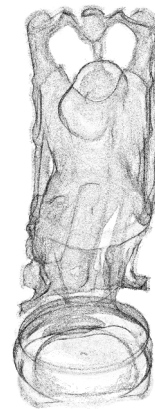

COLMAP

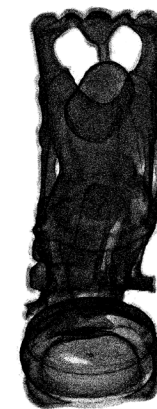

OpenMVS

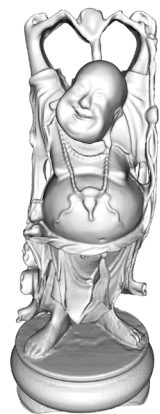

Ground truth

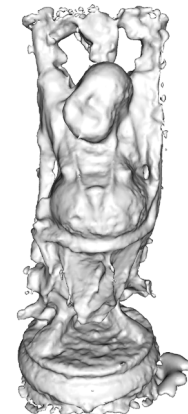

PMVS+Poisson

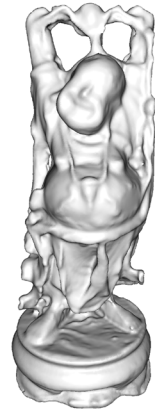

COLMAP+Poisson

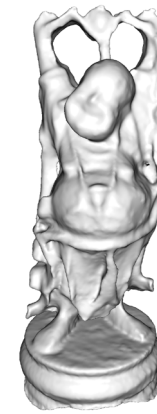

OpenMVS

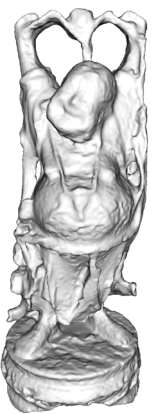

CMPMVS

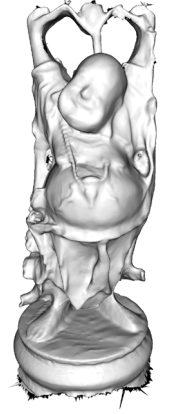

MVIR

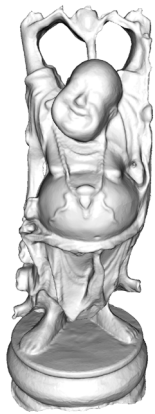

Polarimetric MVIR (Ours)

Estimated illumination

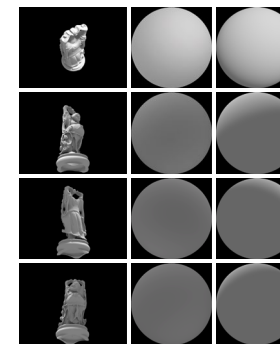

Image Ours GT

# Numerical evaluation

Comparisons of the average accuracy (Acc.) and completeness (Comp.) errors

|           |                            | PMVS   | CMPMVS | COLMAP | OpenMVS | MVIR   | Ours          |
|-----------|----------------------------|--------|--------|--------|---------|--------|---------------|
| Armadillo | # of Vertices              | 60250  | 330733 | 268343 | 2045829 | 305555 | 305548        |
|           | Acc. ( $\times 10^{-2}$ )  | 1.2634 | 0.6287 | 0.7436 | 0.8503  | 0.7667 | <b>0.4467</b> |
|           | Comp. ( $\times 10^{-2}$ ) | 1.5261 | 0.8676 | 1.0295 | 0.6893  | 0.9311 | <b>0.6365</b> |
| Bunny     | # of Vertices              | 92701  | 513426 | 334666 | 2394638 | 399864 | 399863        |
|           | Acc. ( $\times 10^{-2}$ )  | 1.0136 | 0.7766 | 0.7734 | 1.0222  | 0.7629 | <b>0.5706</b> |
|           | Comp. ( $\times 10^{-2}$ ) | 1.3873 | 0.9581 | 1.6987 | 0.8466  | 0.8118 | <b>0.6447</b> |
| Dragon    | # of Vertices              | 88519  | 474219 | 399624 | 2820589 | 460888 | 460667        |
|           | Acc. ( $\times 10^{-2}$ )  | 1.4321 | 0.8826 | 0.9001 | 1.0421  | 0.8563 | <b>0.6258</b> |
|           | Comp. ( $\times 10^{-2}$ ) | 2.0740 | 1.4036 | 1.6606 | 1.3179  | 1.2237 | <b>1.0222</b> |
| Buddha    | # of Vertices              | 61259  | 338654 | 320539 | 2204122 | 348967 | 348691        |
|           | Acc. ( $\times 10^{-2}$ )  | 1.7658 | 1.0565 | 0.9658 | 1.0878  | 1.0588 | <b>0.7926</b> |
|           | Comp. ( $\times 10^{-2}$ ) | 2.4254 | 1.5666 | 2.0094 | 1.4859  | 1.3968 | <b>1.1487</b> |
| Average   | Acc. ( $\times 10^{-2}$ )  | 1.3687 | 0.8361 | 0.8457 | 1.0006  | 0.8612 | <b>0.6089</b> |
|           | Comp. ( $\times 10^{-2}$ ) | 1.8532 | 1.1990 | 1.5996 | 1.0849  | 1.0909 | <b>0.8630</b> |

Comparison using real data



# Toy car: Our results

- 56 views

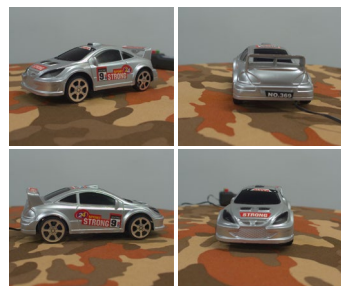

RGB images

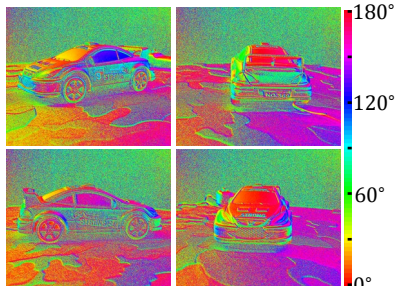

AoP images

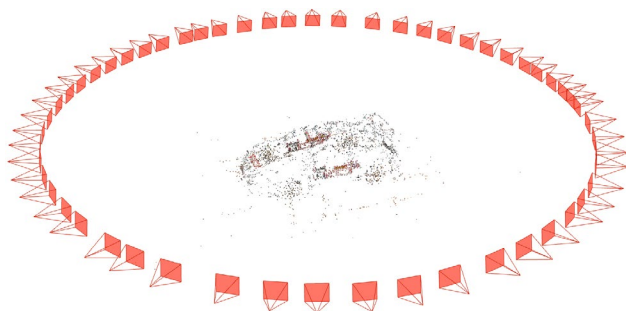

Estimated camera poses

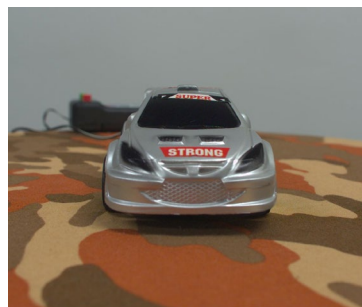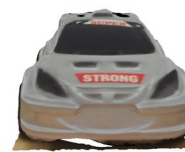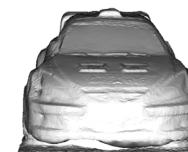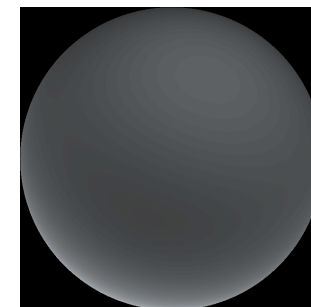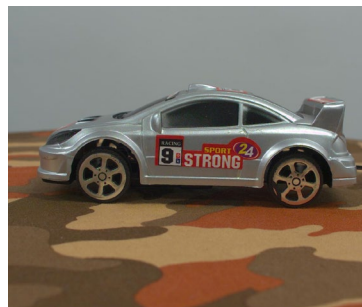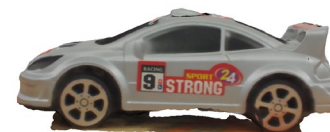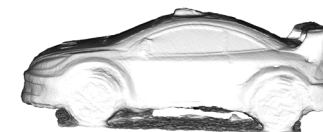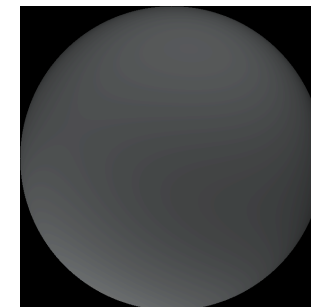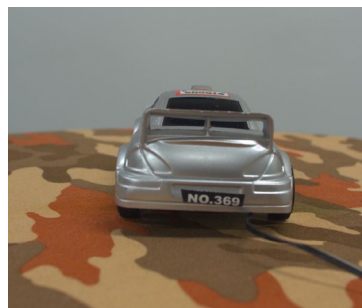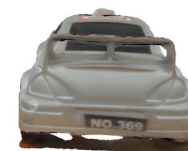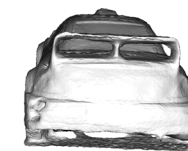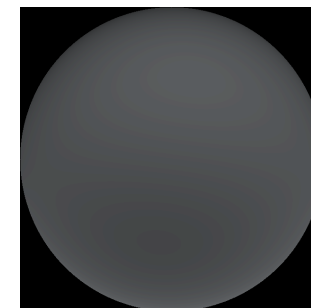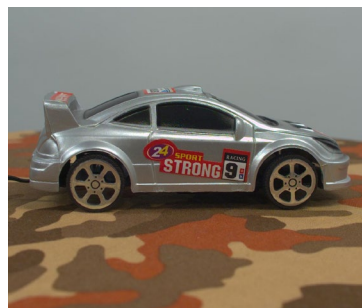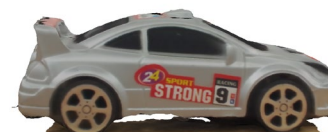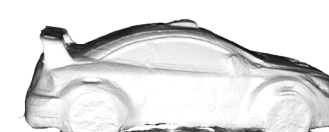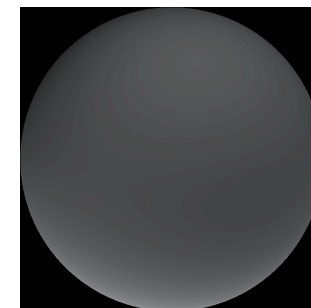

Input image

Estimated albedo

Estimated shape

Estimated illumination

# Toy car: Comparison

## - 56 views

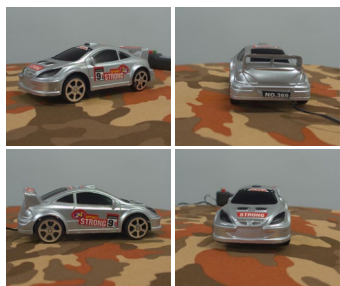

RGB images



AoP images

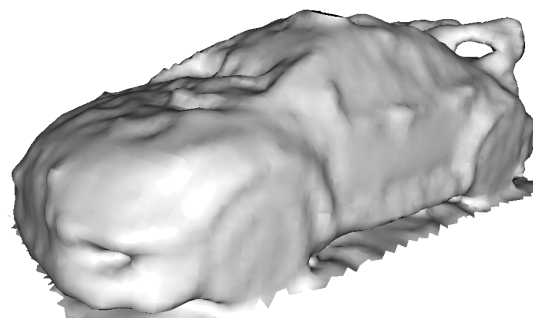

PMVS

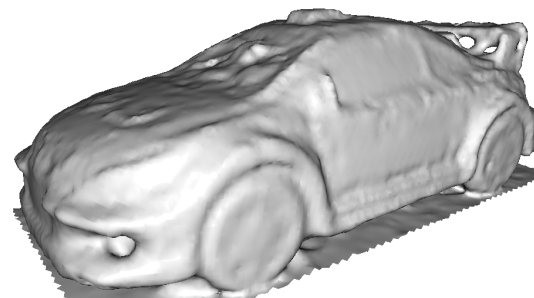

COLMAP+Poisson

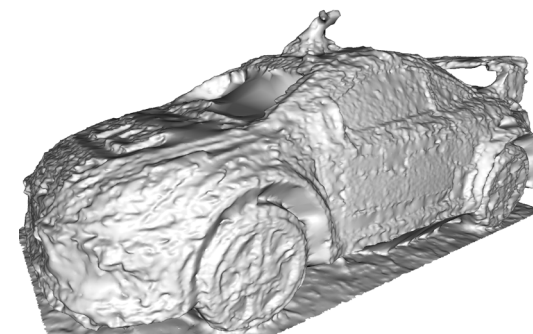

CMPMVS

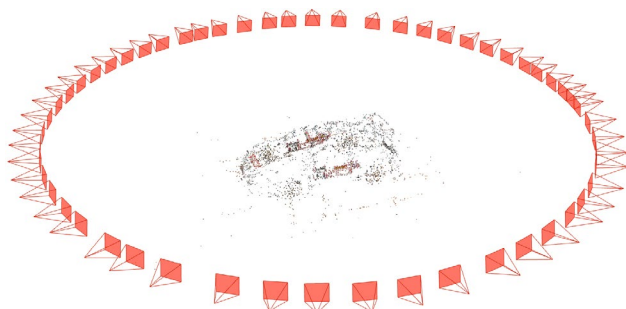

Estimated camera poses

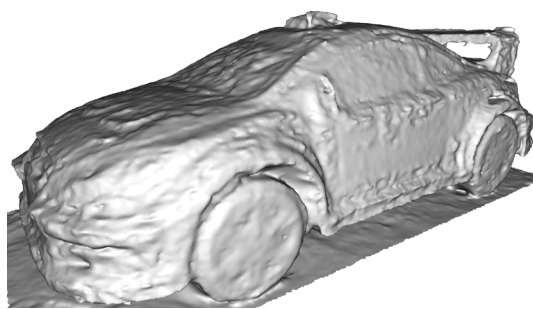

OpenMVS

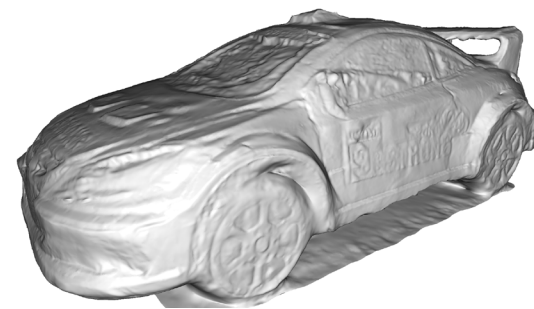

MVIR

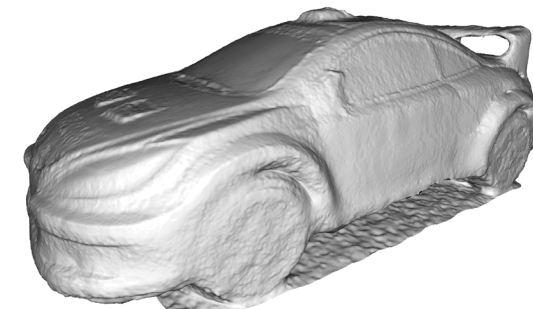

Polarimetric MVIR (Ours)

# Camera: Our results

## - 31 views

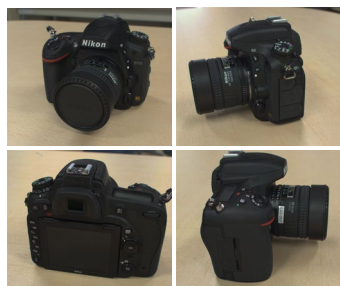

RGB images

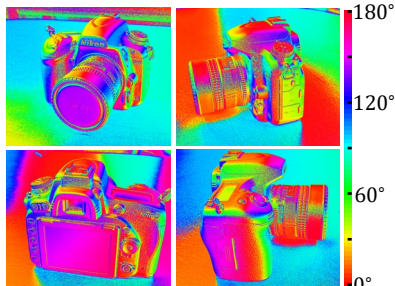

AoP images

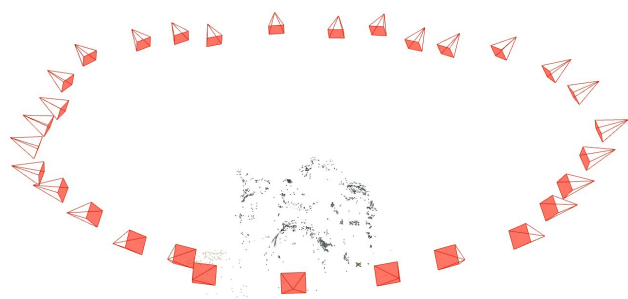

Estimated camera poses

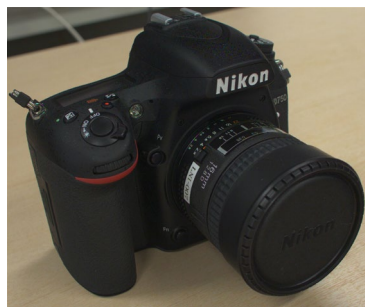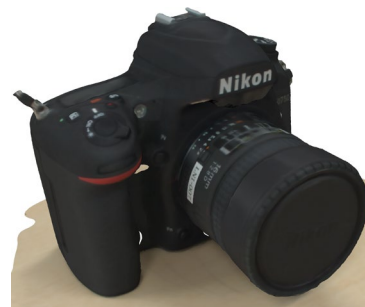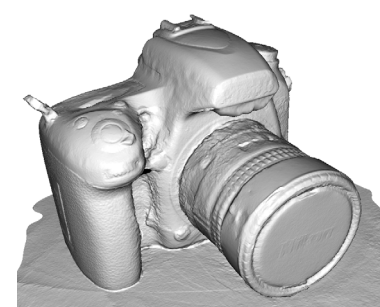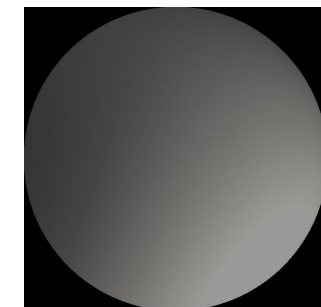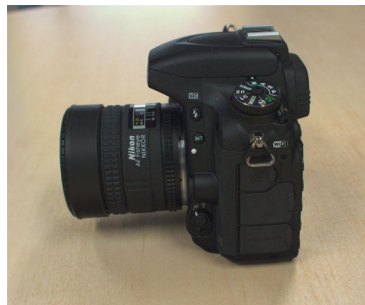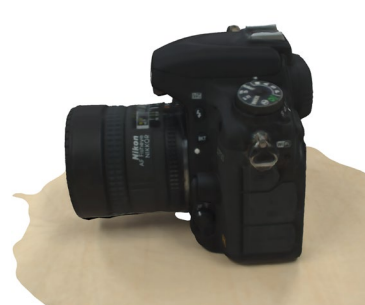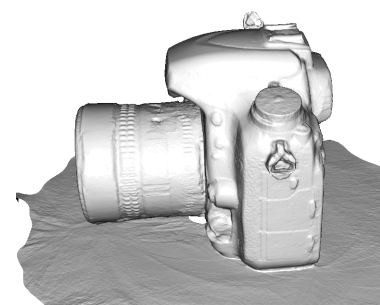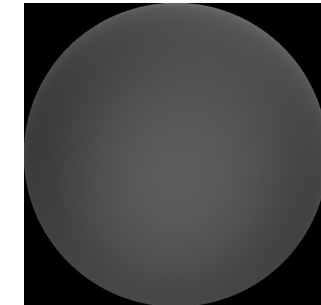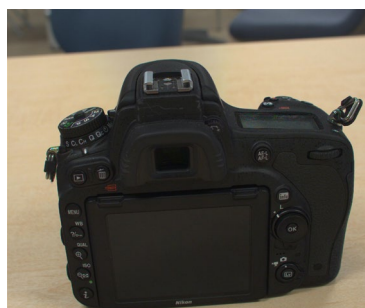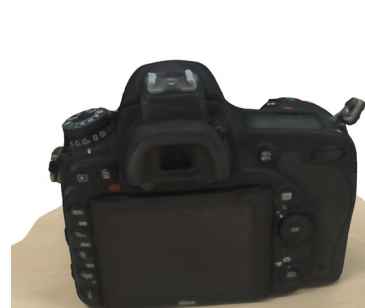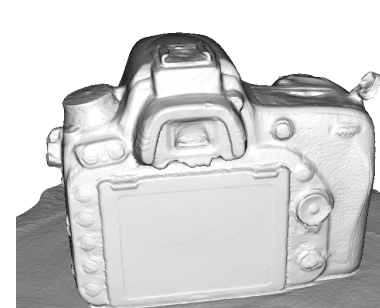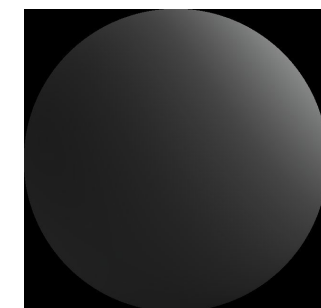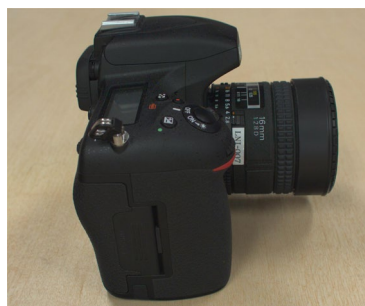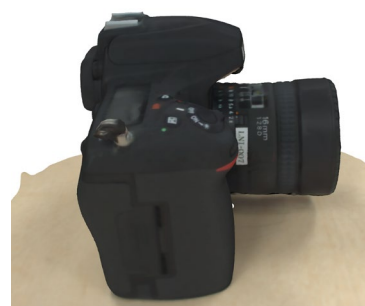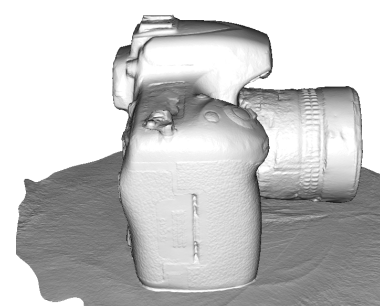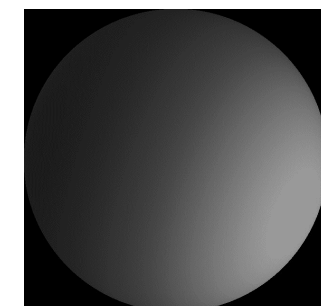

Input image

Estimated albedo

Estimated shape

Estimated illumination

# Camera: Comparison

## - 31 views

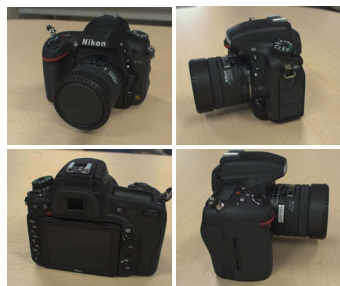

RGB images

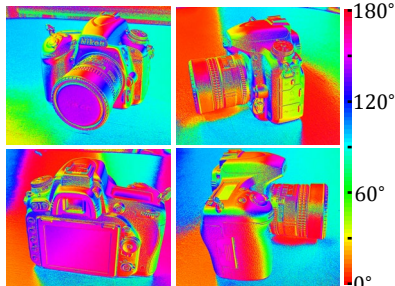

AoP images

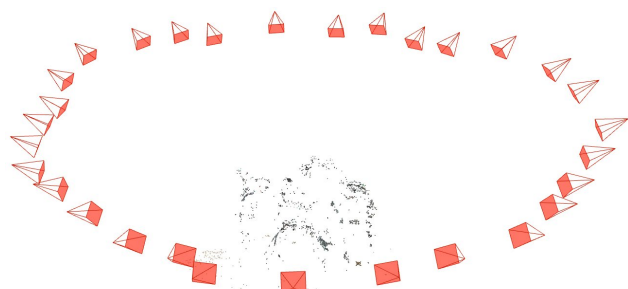

Estimated camera poses

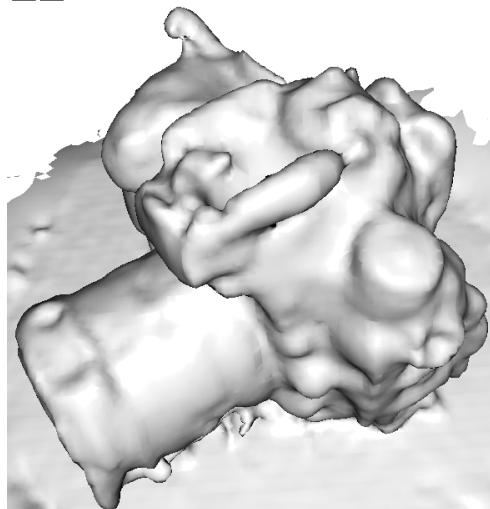

PMVS

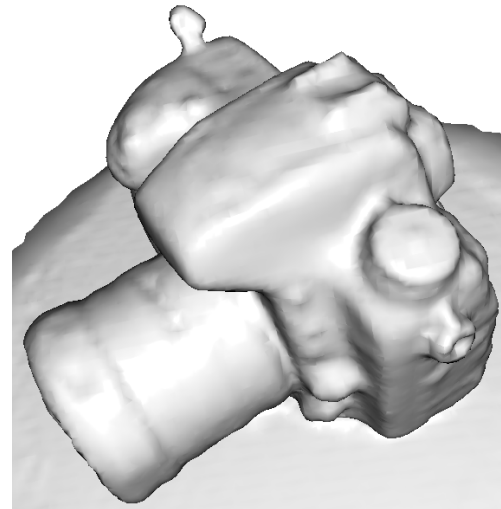

COLMAP+Poisson

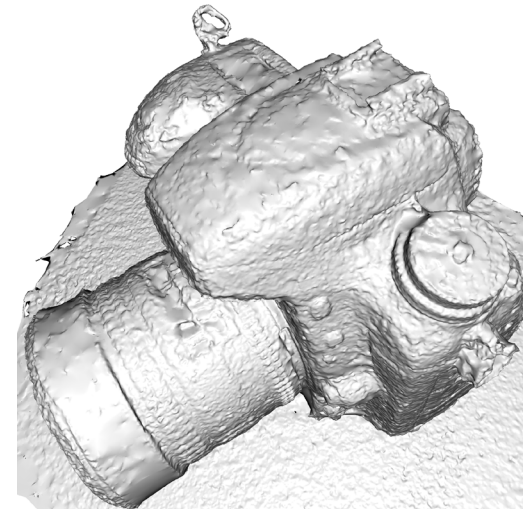

CMPMVS

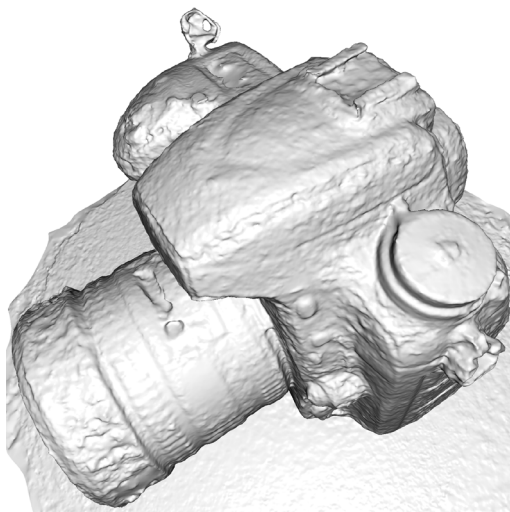

OpenMVS

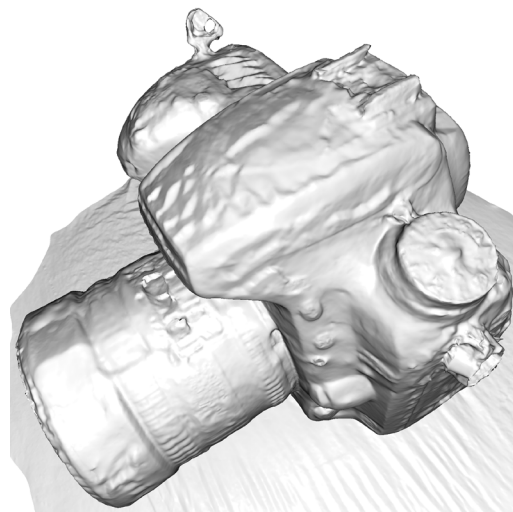

MVIR

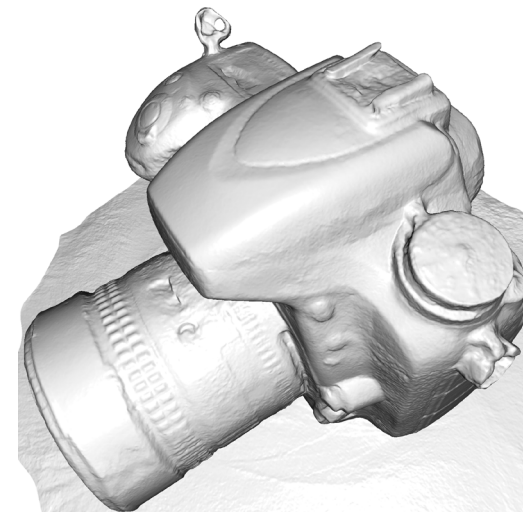

Polarimetric MVIR (Ours)

# Statue: Our results

## - 43 views

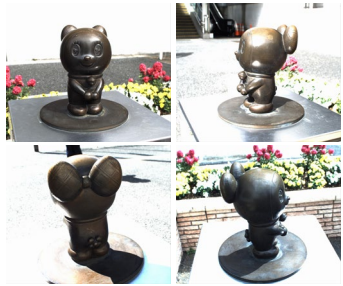

RGB images

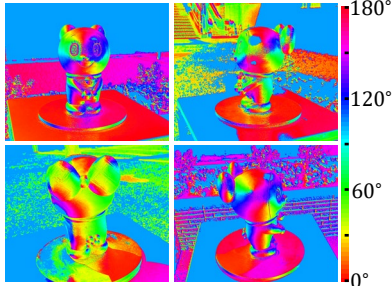

AoP images

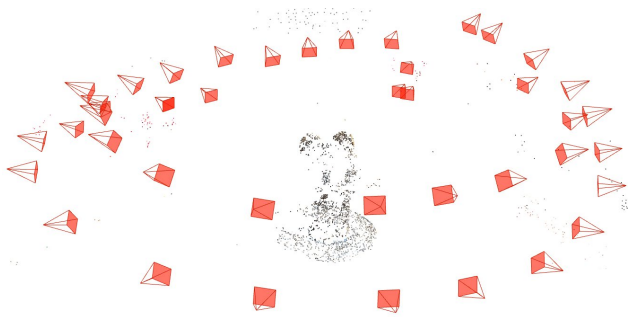

Estimated camera poses

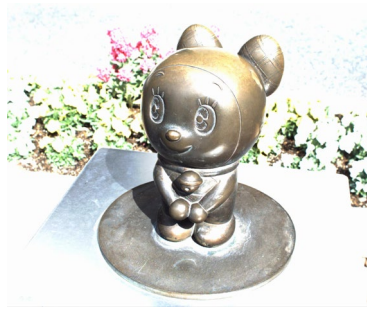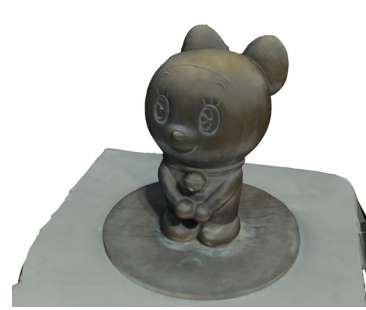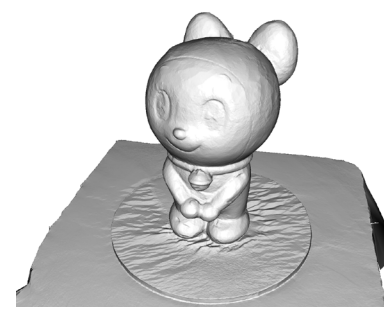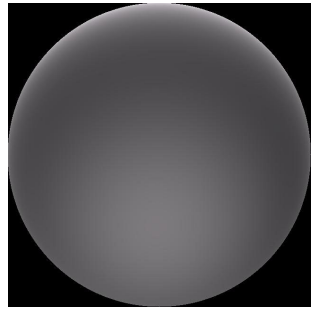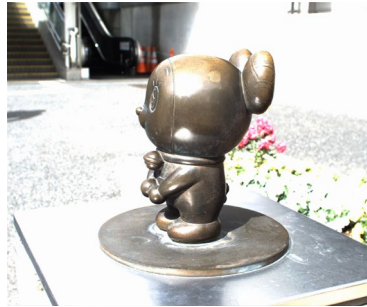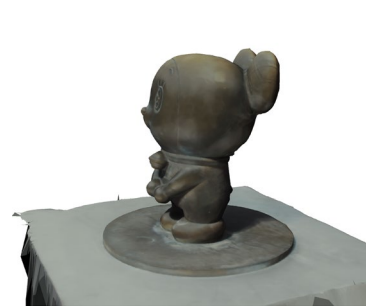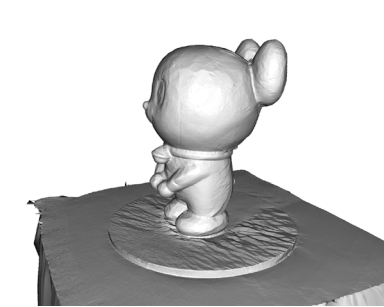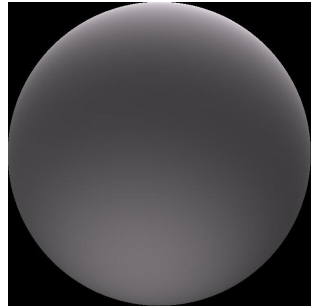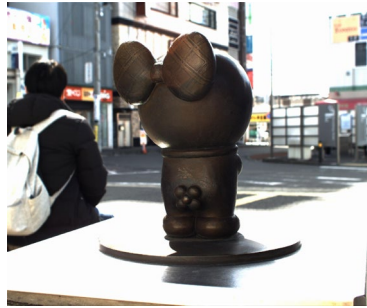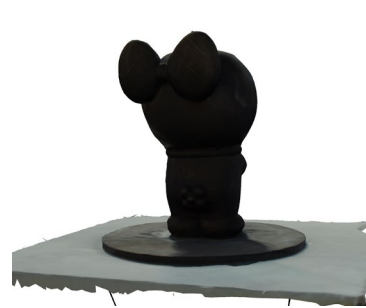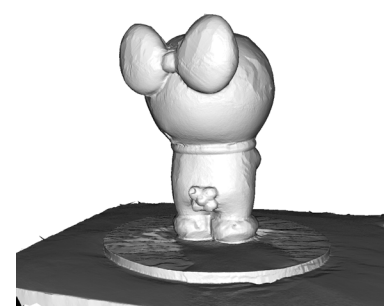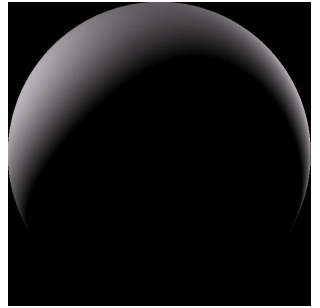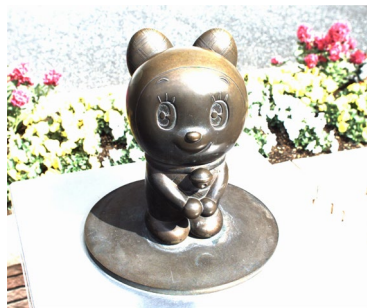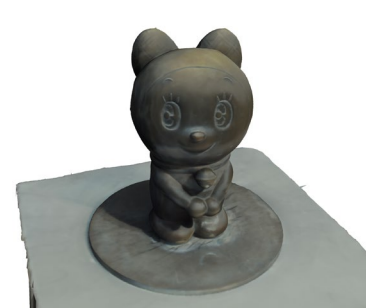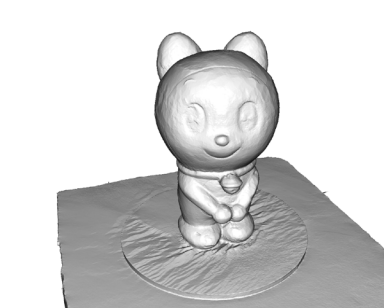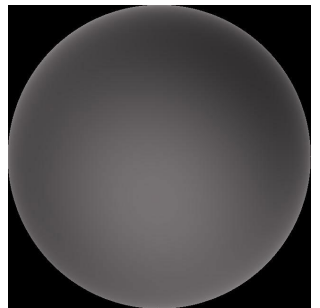

Input image

Estimated albedo

Estimated shape

Estimated illumination

# Statue: Comparison

## - 43 views

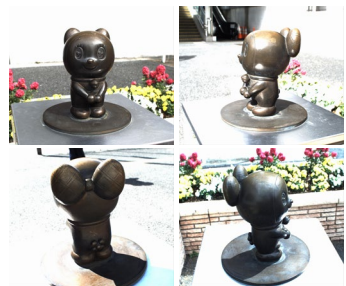

RGB images

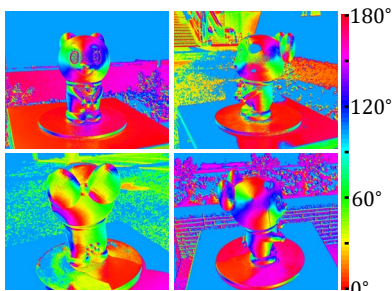

AoP images

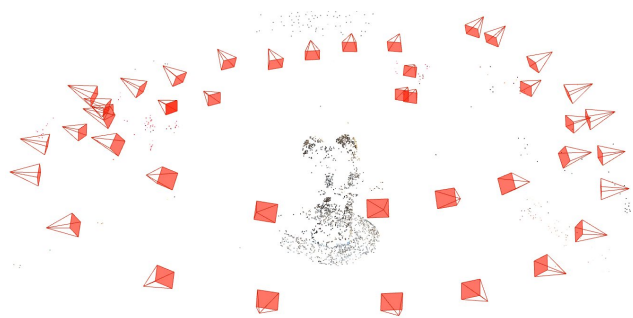

Estimated camera poses

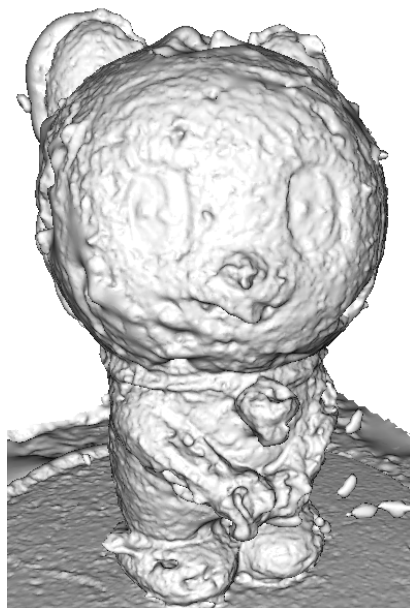

PMVS

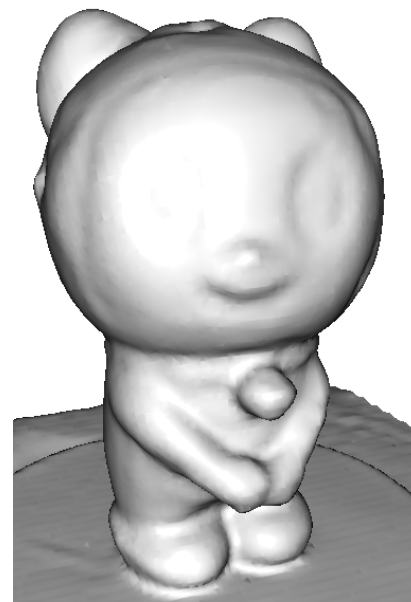

COLMAP+Poisson

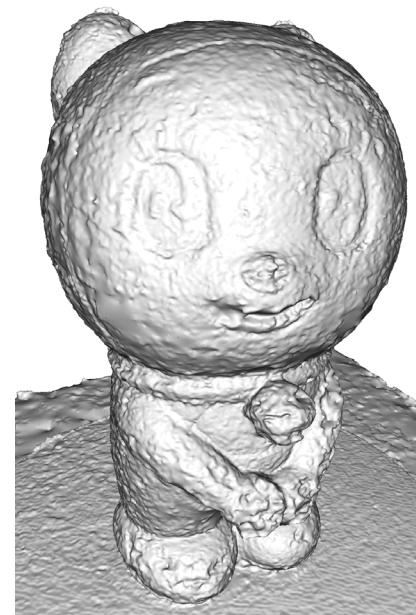

CMPMVS

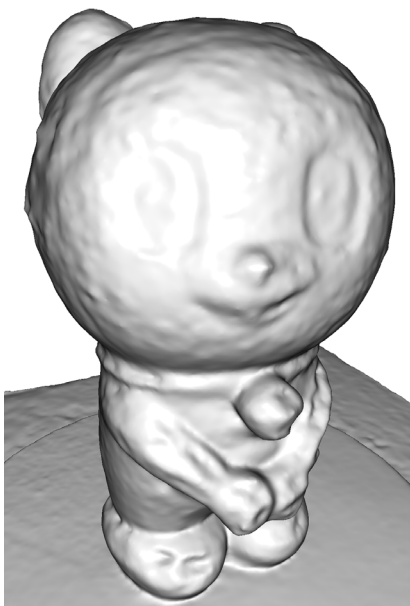

OpenMVS

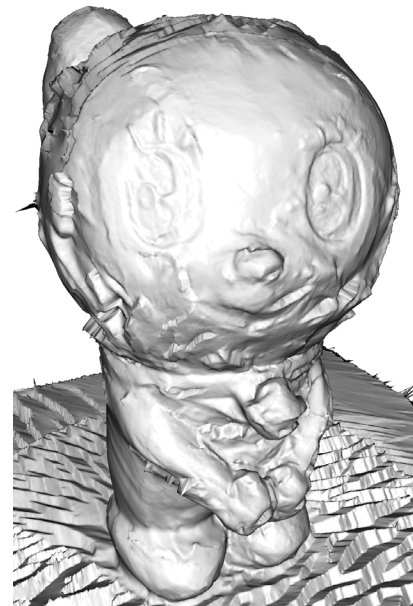

MVIR

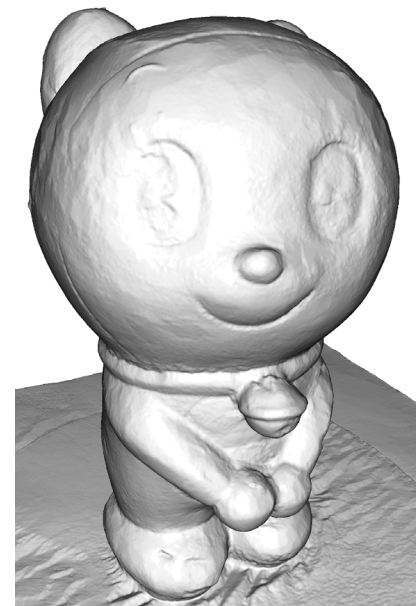

Polarimetric MVIR (Ours)
